# Supplementary material
Source: PubMed Central journal article supplement (PMC5519366)
Supplement: 10.1074_M117.791715_jbc.M117.791715-1.pdf [file 10.1074_M117.791715_jbc.M117.791715-1.pdf]

# Supplemental Data

## **Prolonged fasting suppresses mitochondrial NLRP3 inflammasome assembly and execution via SIRT3 mediated activation of Superoxide Dismutase 2.**

Javier Traba<sup>1</sup>, Sarah S. Geiger<sup>2</sup>, Miriam Kwarteng-Siaw<sup>1</sup>, Kim Han<sup>1</sup>, One Hyuk Ra<sup>1</sup>, Richard M. Siegel<sup>2</sup>, David Gius<sup>3</sup> and Michael N. Sack.<sup>1</sup>

<sup>1</sup>Cardiovascular and Pulmonary Branch, National Heart Lung and Blood Institute, <sup>2</sup>The Autoimmunity Branch, National Institute of Arthritis and Musculoskeletal and Skin Diseases, National Institutes of Health, Bethesda, MD. <sup>3</sup>Northwestern University Feinberg School of Medicine, Chicago, Illinois

Address Correspondence to: Michael N. Sack, MD, Ph.D., National Heart Lung and Blood Institute, Laboratory of mitochondrial biology and metabolism, Bld 10-CRC, Room 5-3150  
10 Center Drive, MSC 1454, Bethesda, MD, 20892-1454, USA, Tel: +1.301.402.9259, Email: [sackm@nih.gov](mailto:sackm@nih.gov)

- **Figure S1**
- **Figure S2**
- **Figure S3**
- **Figure S4**

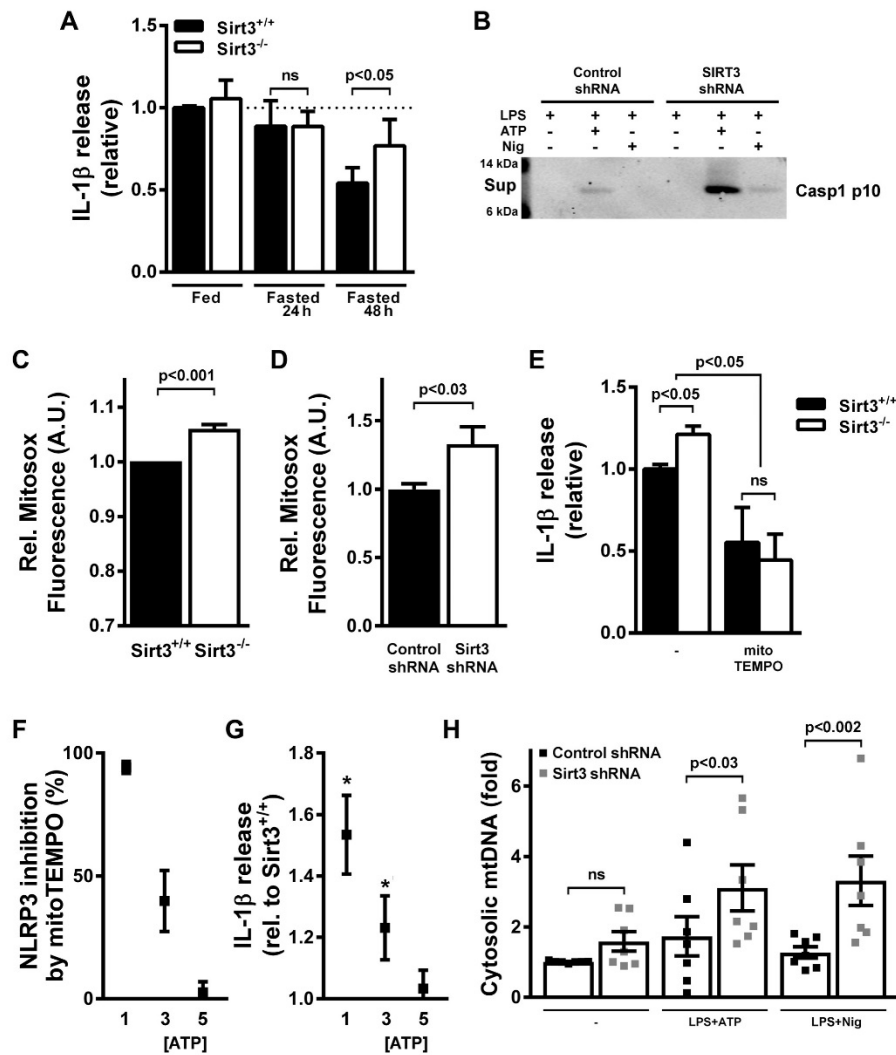

**Figure S1**

**Figure S1.** (A) IL-1 $\beta$  release to culture supernatants of peritoneal macrophages obtained from fed, 24-hour fasted or 48-hour fasted SIRT3<sup>+/+</sup> or SIRT3<sup>-/-</sup> mice primed with LPS and stimulated with 5 mM ATP. IL-1 $\beta$  was measured by ELISA and is represented relative to the release in cells obtained from fed SIRT3<sup>+/+</sup> mice. Bars represent mean  $\pm$  SEM (n=5-9). \*P < 0.05. (B) Immunoblot of release of active caspase-1 (p10 subunit) to supernatants of control or SIRT3 KD J774A.1 cells primed with LPS and left untreated or stimulated with 5 mM ATP or nigericin. (C) Mitochondrial ROS levels in LPS-treated BMDMs. Bars represent mean  $\pm$  SEM (n=4). (D) Mitochondrial ROS levels in LPS-treated J774A.1 cells. Bars represent mean  $\pm$  SEM (n=7). (E) IL-1 $\beta$  release to culture supernatants of BMDMs primed with LPS and stimulated with 3 mM ATP, left untreated or treated with 500  $\mu$ M mitoTEMPO for 15 minutes prior to ATP stimulation. IL-1 $\beta$  was measured by ELISA and is represented relative to the release in untreated SIRT3<sup>+/+</sup>. Bars represent mean  $\pm$  SEM (n=4). (F) Inhibition by mitoTEMPO of the NLRP3 inflammasome (measured as release of IL-1 $\beta$  by ELISA) in BMDMs primed with LPS and stimulated with 1, 3 or 5 mM ATP. Bars represent mean  $\pm$  SEM (n=4). (G) Ratio of release of IL-1 $\beta$  comparing SIRT3<sup>-/-</sup> to SIRT3<sup>+/+</sup> BMDMs primed with LPS and stimulated with 1, 3 or 5 mM ATP. Cytokines were measured by ELISA. Bars represent mean  $\pm$  SEM (n=6). (H) Measurement of mitochondrial genomic DNA extrusion in control or SIRT3 knockdown J774A.1 macrophages left untreated or primed with LPS and stimulated with ATP or nigericin. Bars represent mean  $\pm$  SEM (n=7).

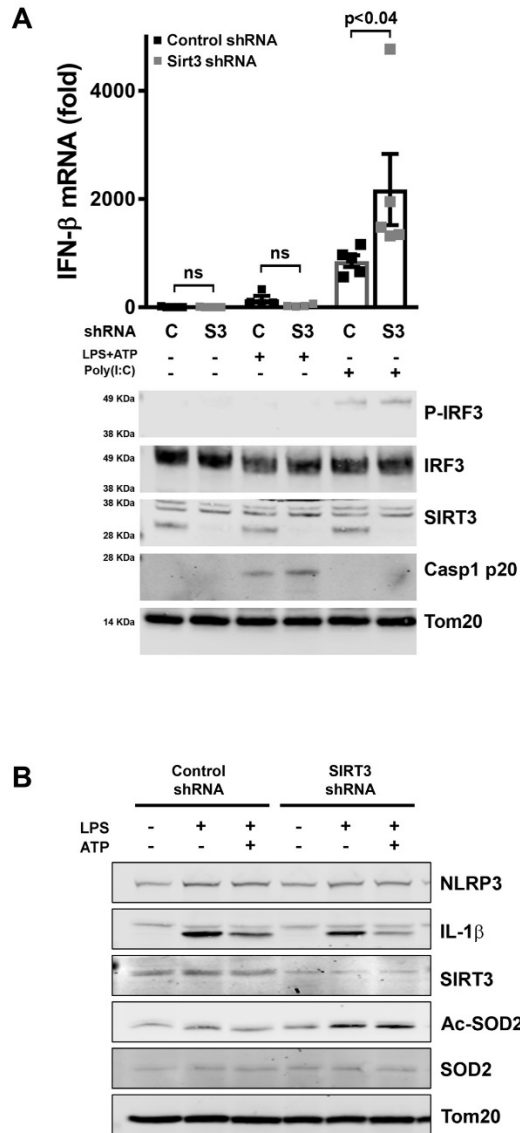

**Figure S2**

**Figure S2.** (A) Transcript levels of interferon  $\beta$  in response to inflammasome induction and in response to poly (I:C) comparing control and SIRT3 KD J774A.1 macrophages. Immunoblot shows the corresponding phosphorylation of interferon regulatory factor 3 and the cleavage of caspase 1 in response to the same triggers. The respective SIRT3 levels are shown and protein loading is represented by the levels of Tom 20. (B) Immunoblot analysis of steady-state protein levels of inflammasome components in control or SIRT3 KD J774A.1 cells left untreated or primed with LPS and left unstimulated or stimulated with 5 mM ATP.

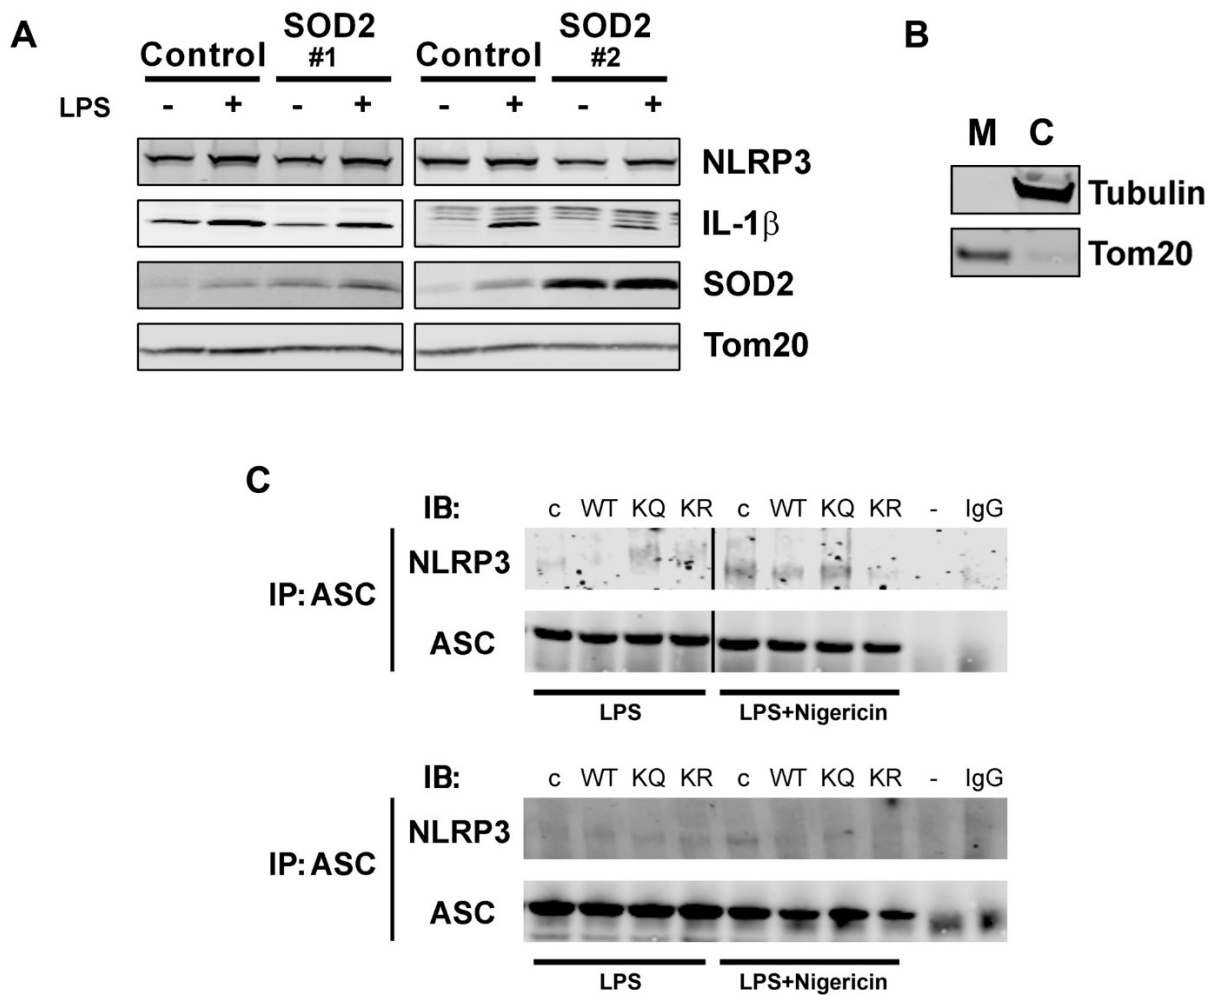

**Figure S3**

**Figure S3.** (A) The steady-state protein levels of NLRP3 and IL-1 $\beta$  in the presence or absence of LPS in two different SOD2 overexpressing clones of THP-1 macrophages (#1, low SOD2; #2, high SOD2) was analyzed by immunoblot. (B) The purity of mitochondrial fractions was tested by probing for the cytosolic protein tubulin, which is present in cytosolic fractions (C) but not mitochondria (M). (C) Replicates for the immunoprecipitation study shown in figure 4.

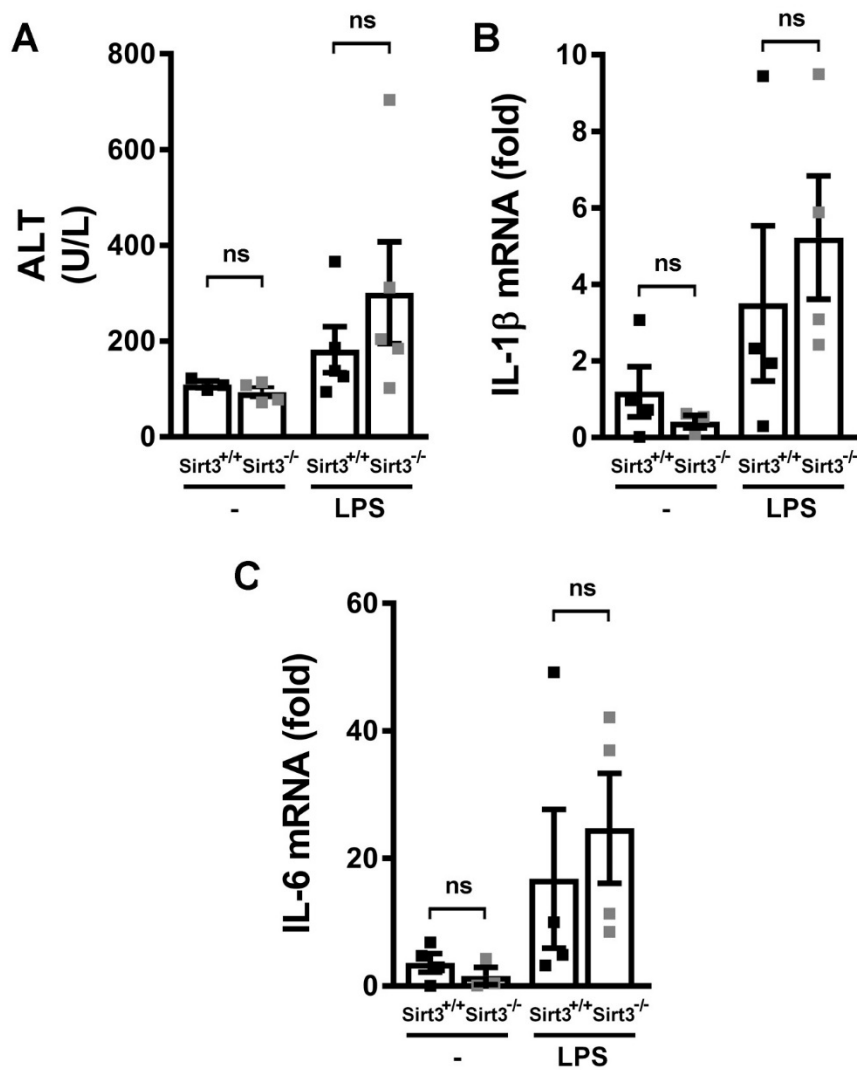

**Figure S4**

**Figure S4.** Fed SIRT3<sup>+/+</sup> or SIRT3<sup>-/-</sup> mice were injected intraperitoneally with PBS (-) or 1 mg/Kg LPS, and 2 hours later ALT (A) in the serum, and the mRNA of IL-1β (B) and IL-6 (C) in the cells that mobilize to the peritoneal cavity were measured. Bars represent mean ± SEM (A, n=5; B, C: n=4).
